# Supplementary material
Source: publisher site journal article supplement (https://www.spandidos-publications.com/1683/downloadSupplementary)
Supplement: Supplementary file 1 [file downloadSupplementary]

## Sheet: Table S6
Table SVI. List of known sRNAs differentially expressed in asymptomatic HTLV-1 infected subjects with polyclonal T cell expansion (ASP) vs healthy control (HC)subjects
Gene ID	p (Corr)	p	Regulation	FC (abs)	FC	Log FC	Accession	Entrez ID	Ensembl ID	Gene Type	DB Refs
MI0000483	8.50E-07	1.12E-07	down	5685015	-5685015	-25071642	hsa-mir-186	406962		miRNA	miRBase:MI0000483
chr1.trna68	0.001033523	4.11E-04	down	9887073	-9887073	-33055434	trna68			tRNA
MI0000291	4.02E-06	6.35E-07	down	105389385	-105389385	-33976576	hsa-mir-215	406997	ENSG00000207590	miRNA	miRBase:MI0000291
MI0017308	0.002343559	0.001017598	down	25536637	-25536637	-13525685	hsa-mir-4677	100616343		miRNA	miRBase:MI0017308
ENSG00000222345	0.001033523	4.22E-04	up	52703304	52703304	23978934	SNORD19		ENSG00000222345	snoRNA	RFAM:RF00569
MI0003583	0.003013796	0.001467243	down	35061383	-35061383	-18098829	hsa-mir-576	693161		miRNA	miRBase:MI0003583
ENSG00000239286	0.026473003	0.016371462	down	30866594	-30866594	-16260463	AC109927.1		ENSG00000239286	scRNA_pseudogene
chr6.trna62	2.94E-04	9.16E-05	down	5144012	-5144012	-2362894	trna62			tRNA
chr6.trna65	0.024634792	0.014910532	up	25673926	25673926	13603039	trna65			tRNA
ENSG00000221500	8.49E-06	1.56E-06	up	31635664	31635664	498348	SNORD100	594838	ENSG00000221500	snoRNA	RFAM:RF00609
MI0003600	2.77E-07	3.28E-08	down	29631672	-29631672	-4889068	hsa-mir-550a-1	693133		miRNA	miRBase:MI0003600
MI0003601	2.77E-07	3.28E-08	down	29631672	-29631672	-4889068	hsa-mir-550a-2	693134	ENSG00000207573	miRNA	miRBase:MI0003601
MI0000272	3.97E-05	8.35E-06	down	1668866	-1668866	-40607963	hsa-mir-182	406958	ENSG00000207990	miRNA	miRBase:MI0000272
MI0002470	2.77E-07	2.61E-08	down	15352539	-15352539	-39404054	hsa-mir-486	619554		miRNA	miRBase:MI0002470
MI0000439	1.04E-07	4.35E-09	up	73021385	73021385	6190247	hsa-mir-23b	407011		miRNA	miRBase:MI0000439
MI0016747	6.81E-04	2.49E-04	down	846307	-846307	-3081181	hsa-mir-1254-2	100616217	ENSG00000264574	miRNA	miRBase:MI0016747
MI0006388	6.81E-04	2.51E-04	down	8258392	-8258392	-3045861	hsa-mir-1254-1	100302273		miRNA	miRBase:MI0006388
MI0003129	0.001794852	7.56E-04	up	32228963	32228963	16883577	hsa-mir-146b	574447	ENSG00000202569	miRNA	miRBase:MI0003129
MI0006444	0.008522608	0.004709863	down	3377862	-3377862	-17561103	hsa-mir-1307	100302174	ENSG00000221767	miRNA	miRBase:MI0006444
chr11.trna12	1.37E-04	3.60E-05	down	4838725	-4838725	-2274627	trna12			tRNA
ENSG00000202314	0.003624436	0.001812218	up	11853713	11853713	35672672	SNORD6	692075	ENSG00000202314	snoRNA	RFAM:RF00342
MI0000061	5.32E-04	1.75E-04	up	37073052	37073052	18903708	hsa-let-7a-2	406882	ENSG00000198975	miRNA	miRBase:MI0000061|RFAM:RF00027
MI0000102	0.010372882	0.006005352	down	141550865	-141550865	-38232486	hsa-mir-100	406892	ENSG00000207994	miRNA	miRBase:MI0000102|RFAM:RF00104
MI0000071	0.004286364	0.002199582	down	26128366	-26128366	-13856169	hsa-mir-17	406952	ENSG00000215417	miRNA	miRBase:MI0000071|RFAM:RF00051
MI0000072	1.73E-04	4.79E-05	down	11706257	-11706257	-3549208	hsa-mir-18a	406953		miRNA	miRBase:MI0000072
chr14.trna13	0.002756325	0.001305627	up	4086399	4086399	20308301	trna13			tRNA
MI0000825	2.15E-05	4.24E-06	down	56636677	-56636677	-25017366	hsa-mir-345	442910	ENSG00000198984	miRNA	miRBase:MI0000825
ENSG00000199214	5.35E-05	1.27E-05	up	11149496	11149496	34789066	Y_RNA		ENSG00000199214	scRNA	RFAM:RF00019
chr15.trna11	0.005856948	0.003159669	up	33248765	33248765	17333008	trna11			tRNA
chr15.trna2	0.002576281	0.001186445	up	40754375	40754375	2026955	trna2			tRNA
MI0014210	5.28E-05	1.18E-05	down	7725609	-7725609	-29496486	hsa-mir-3176	100423037		miRNA	miRBase:MI0014210
chr16.trna10	7.88E-04	3.01E-04	up	57400775	57400775	25210702	trna10			tRNA
chr16.trna27	5.71E-04	1.95E-04	up	70403194	70403194	2815641	trna27			tRNA
ENSG00000199949	2.94E-04	9.28E-05	down	73754764	-73754764	-28827362	Y_RNA		ENSG00000199949	scRNA	RFAM:RF00019
chr17.trna7	1.92E-04	5.55E-05	down	52975707	-52975707	-2405331	trna7			tRNA
MI0000460	6.87E-08	1.81E-09	down	53031506	-53031506	-9050706	hsa-mir-144	406936	ENSG00000264066	miRNA	miRBase:MI0000460
MI0000745	0.009611483	0.005438076	down	23533404	-23533404	-123471	hsa-mir-301a	407027		miRNA	miRBase:MI0000745
MI0000077	2.45E-07	1.61E-08	up	49236474	49236474	22997274	hsa-mir-21	406991	ENSG00000199004	miRNA	miRBase:MI0000077
MI0000079	1.04E-07	5.45E-09	up	3842049	3842049	5263804	hsa-mir-23a	407010	ENSG00000207980	miRNA	miRBase:MI0000079
ENSG00000251806	2.29E-06	3.32E-07	up	44578003	44578003	547826	SNORD119	100113378	ENSG00000251806	snoRNA	RFAM:RF00570
ENSG00000221116	0.024634792	0.014797536	up	80433035	80433035	30077882	SNORD110	692213	ENSG00000221116	snoRNA	RFAM:RF00610
ENSG00000212232	2.77E-07	2.89E-08	up	12091228	12091228	35958889	SNORD17	692086	ENSG00000212232	snoRNA	RFAM:RF00567
MI0000681	6.87E-08	1.34E-09	up	8094559	8094559	63388805	hsa-mir-155	406947	ENSG00000234883	miRNA	miRBase:MI0000681
MI0020364	8.49E-06	1.52E-06	up	6224019	6224019	26378465	hsa-mir-6087			miRNA	miRBase:MI0020364
MI0001519	8.07E-05	2.02E-05	down	7946762	-7946762	-29903672	hsa-mir-20b	574032	ENSG00000207710	miRNA	miRBase:MI0001519
